# Supplementary material
Source: MDPI journal article supplement (https://www.mdpi.com/2311-5637/6/1/29)
Supplement: s1 [file s1]

**Figure S1:** some representative chromatograms for biotransformation

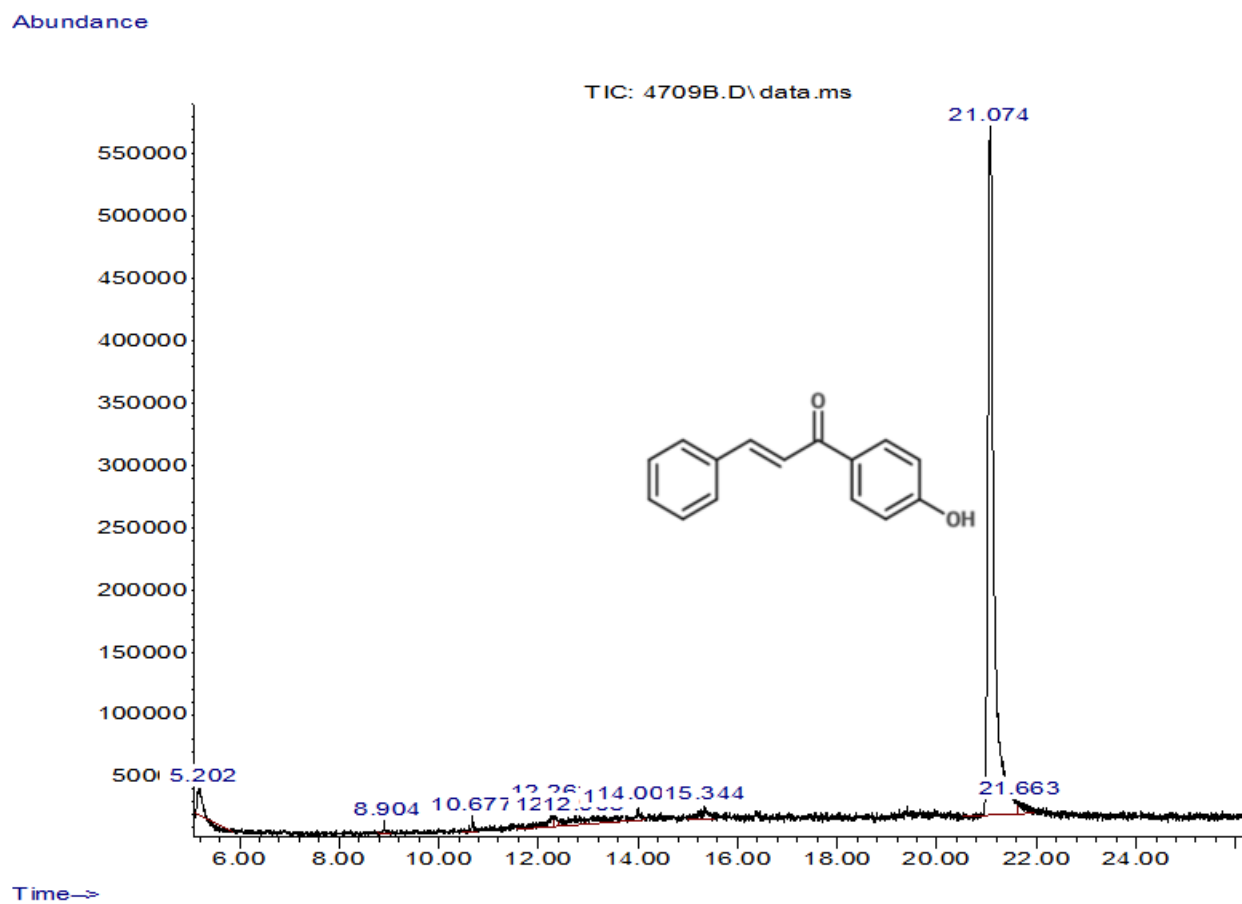

Abundance

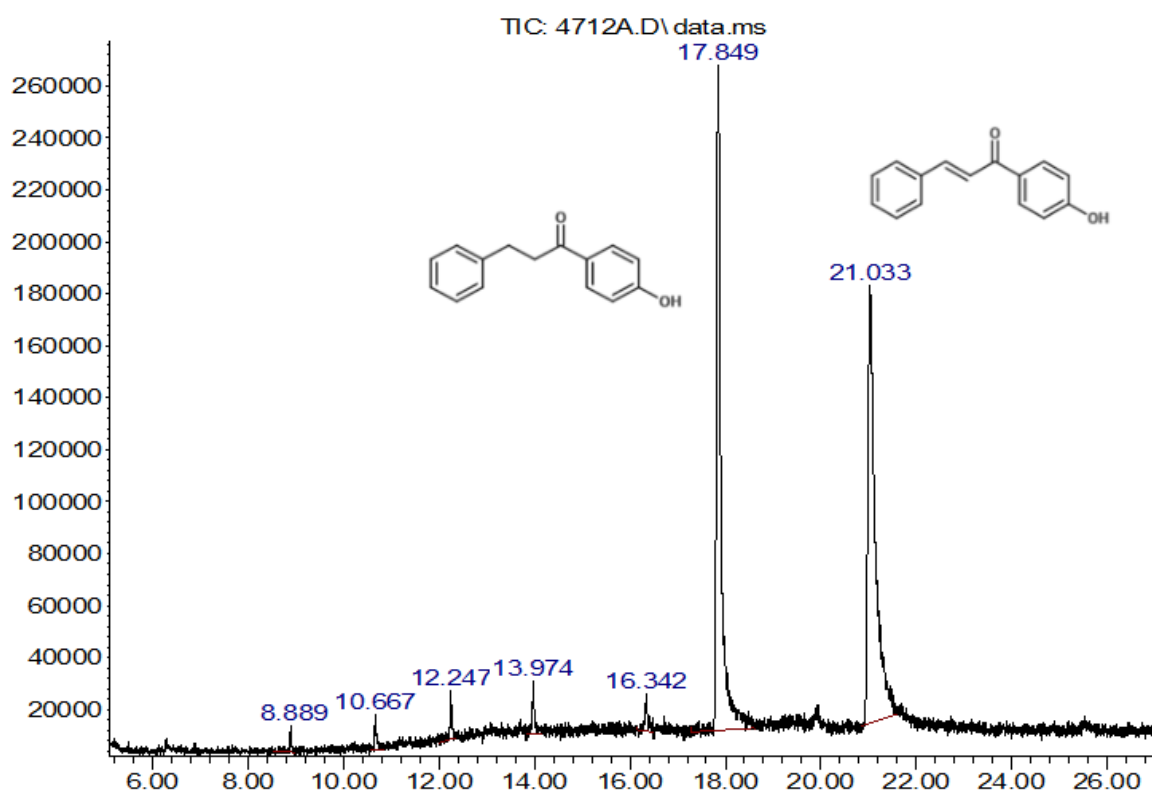

Time→

Abundance

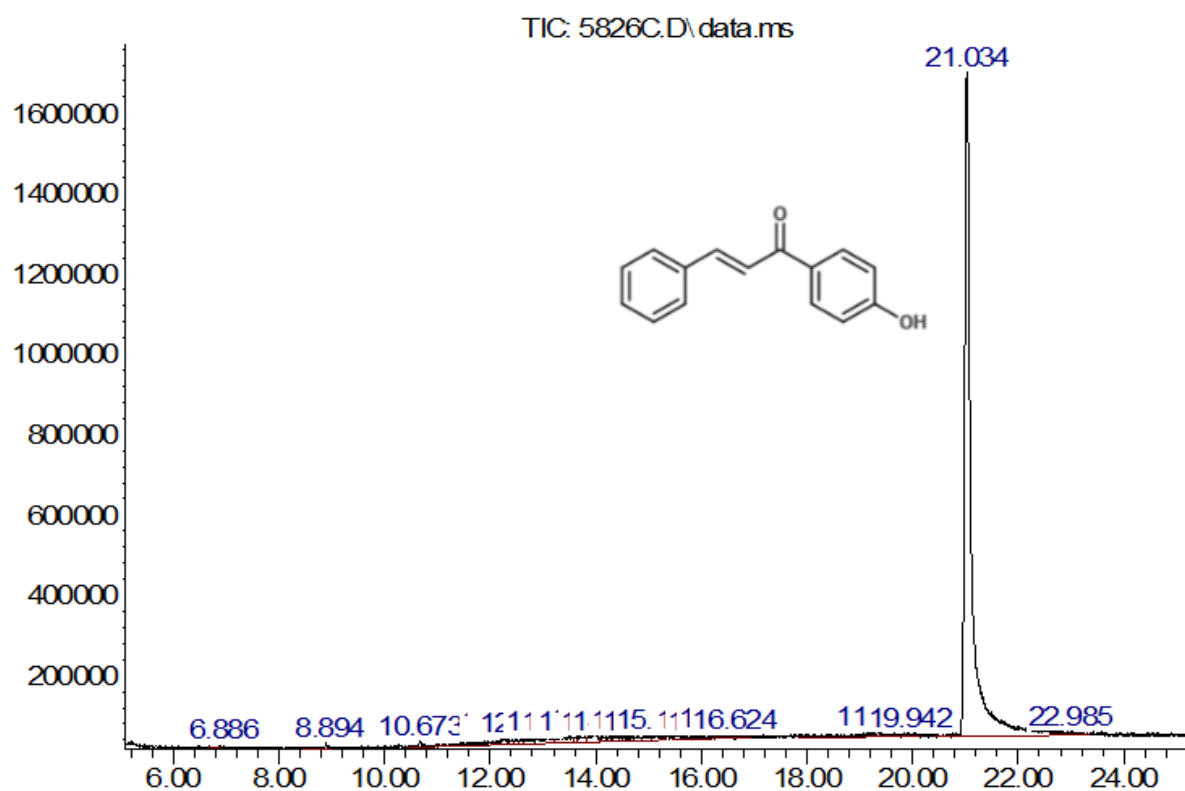

Time→

Abundance

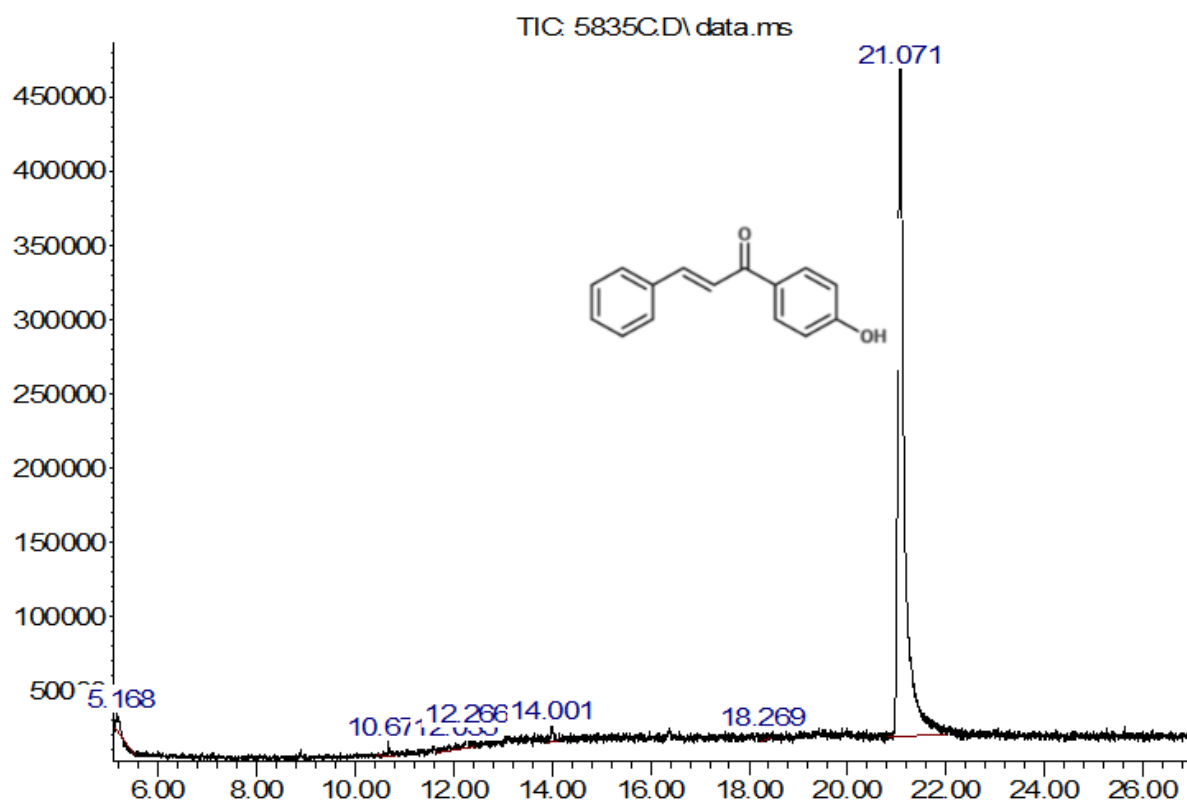

Time-->

Abundance

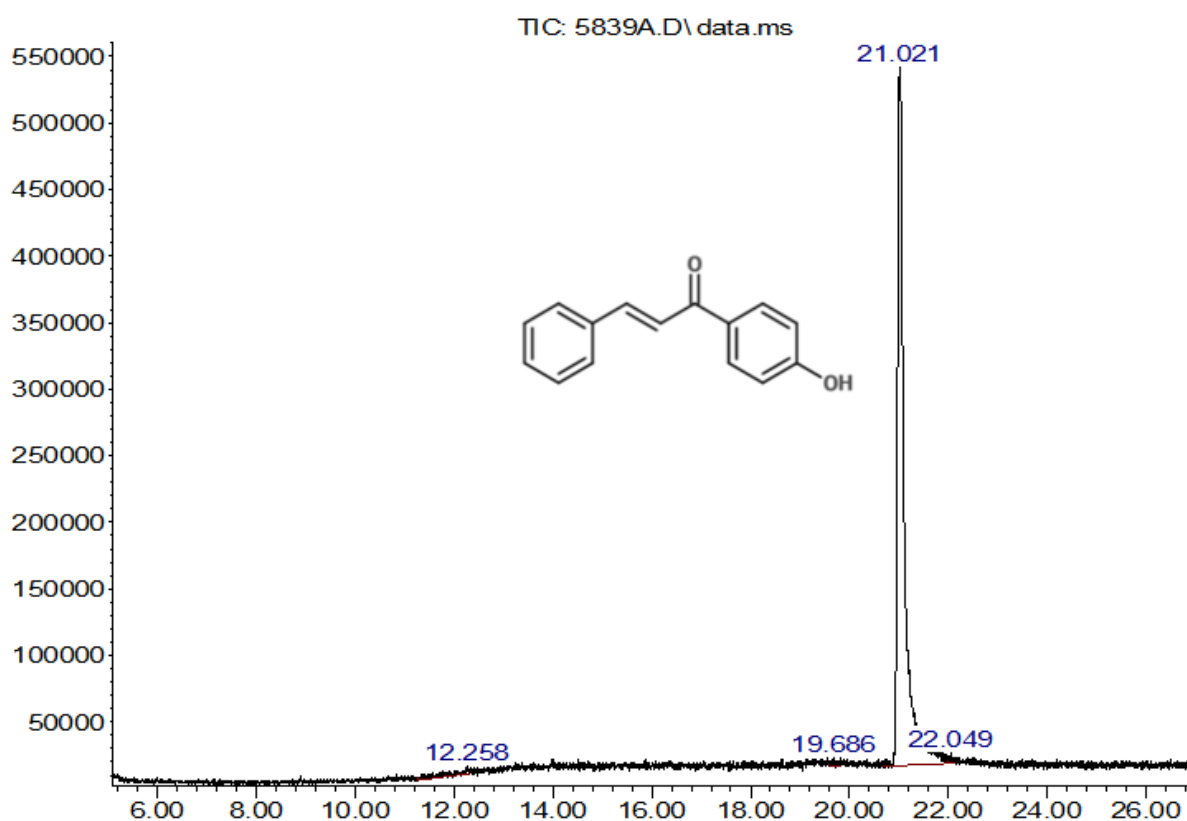

Time-->

Abundance

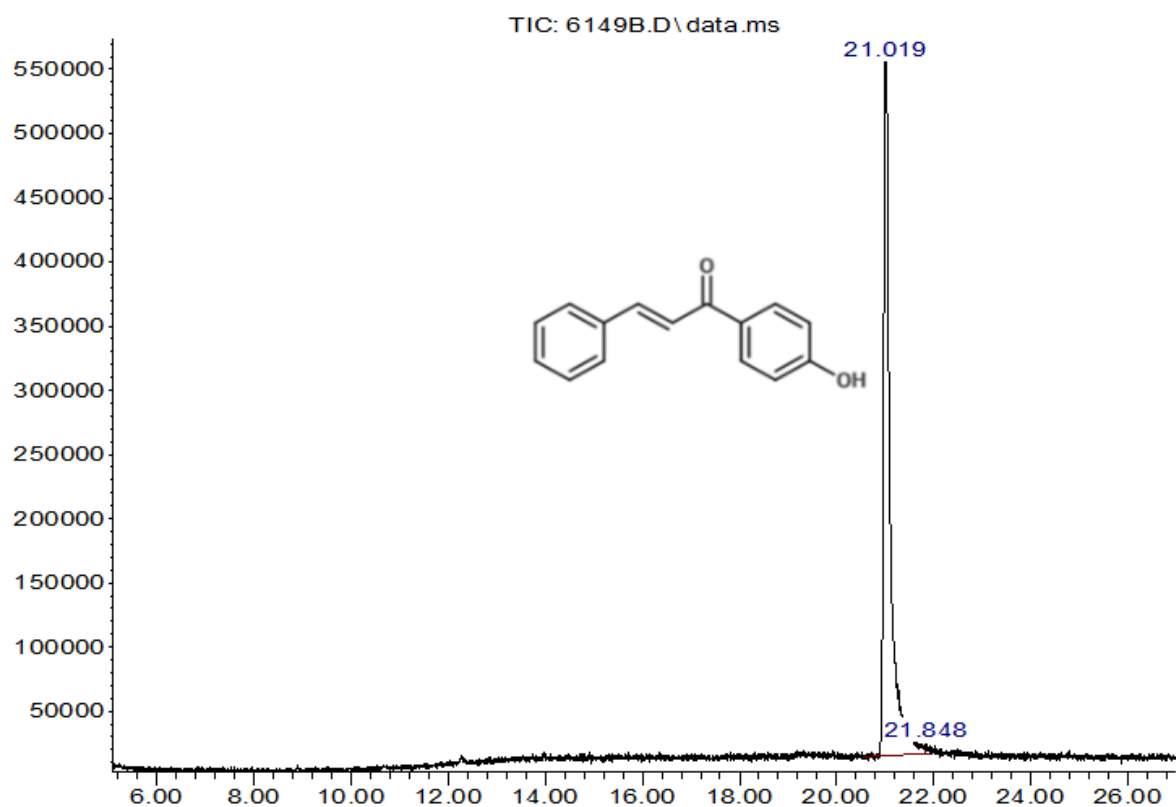

Abundance

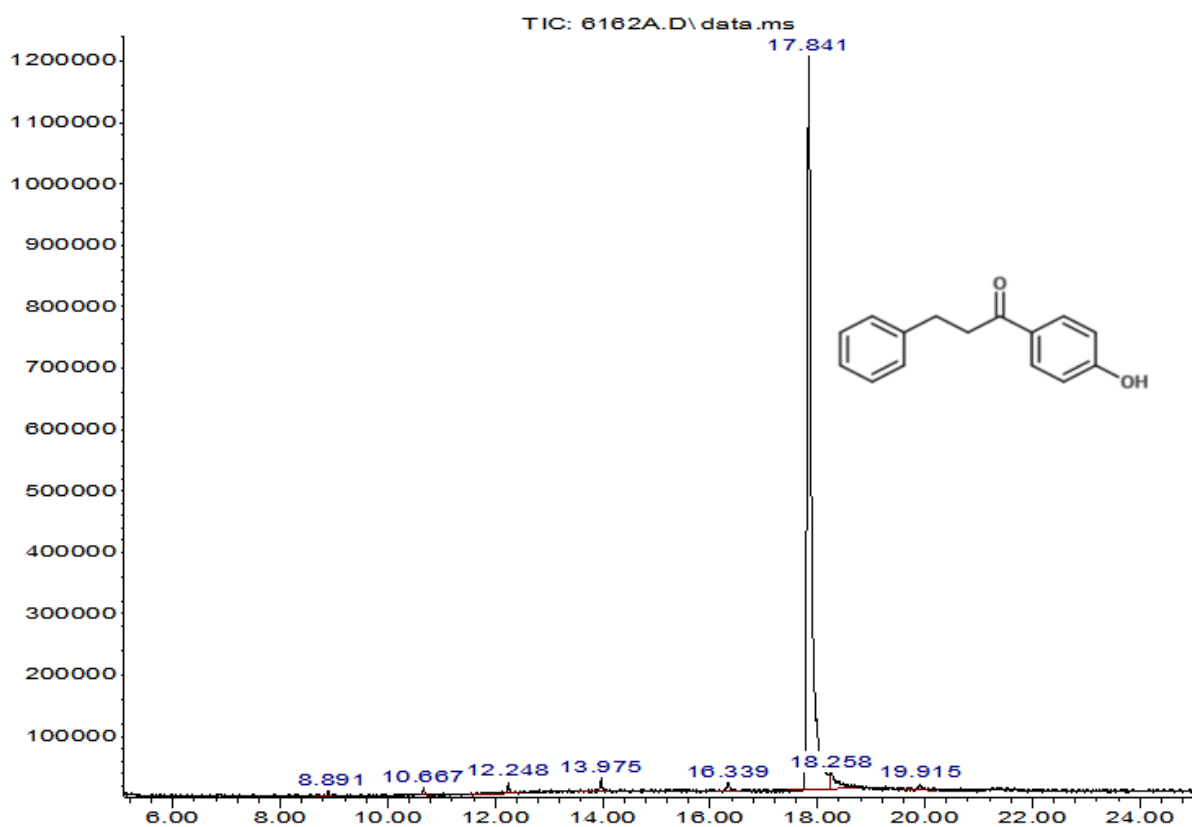

Abundance

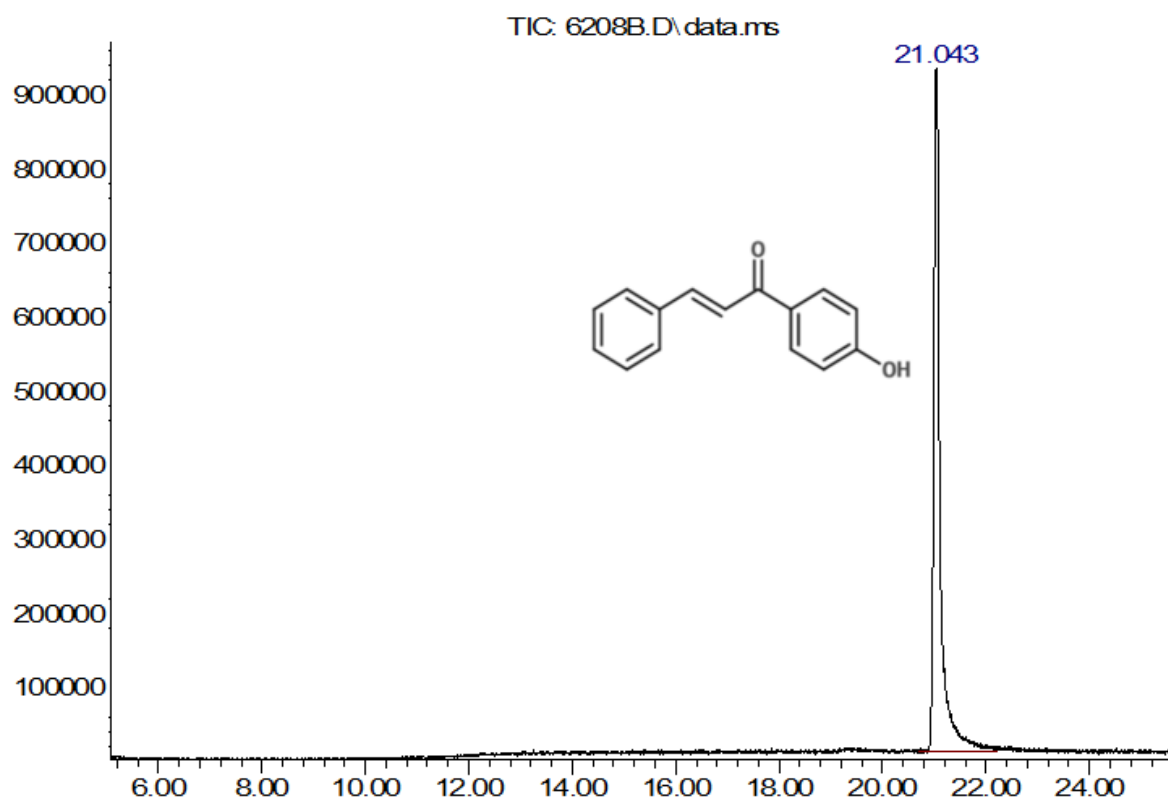

Time→

Abundance

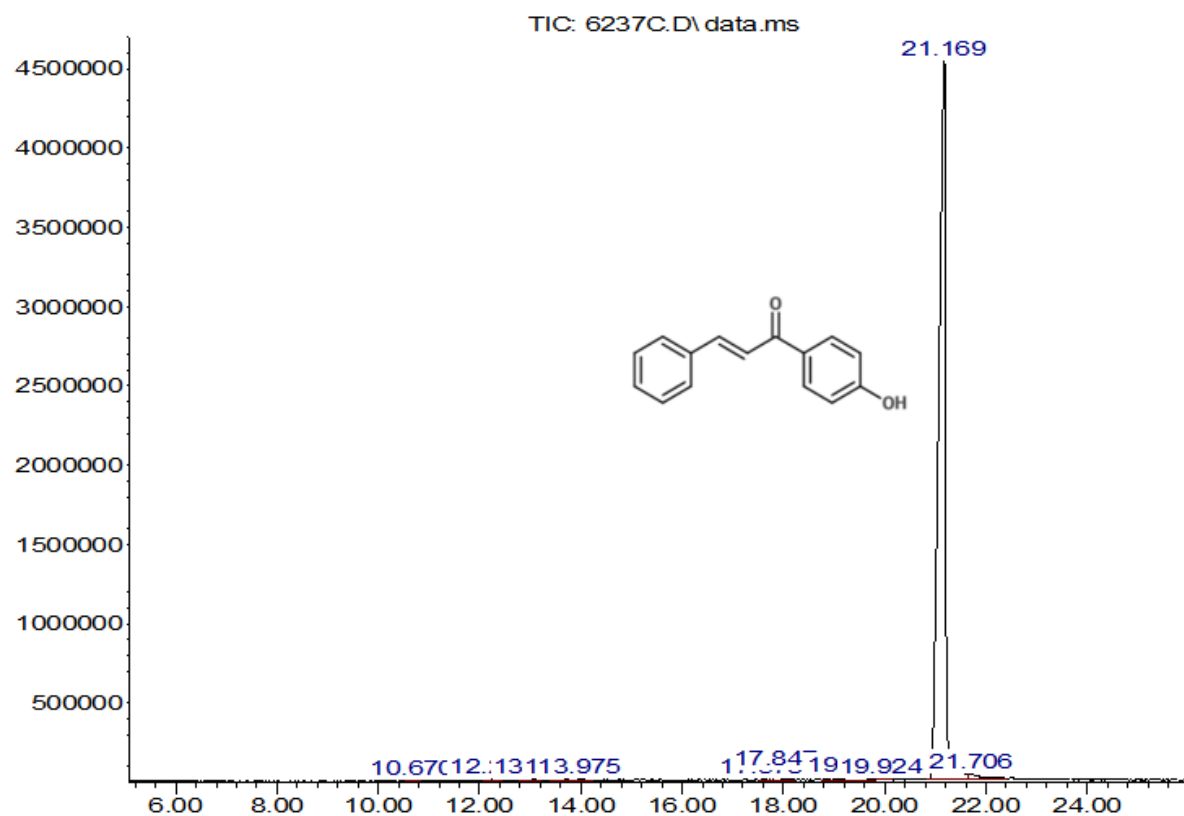

Time→

Abundance

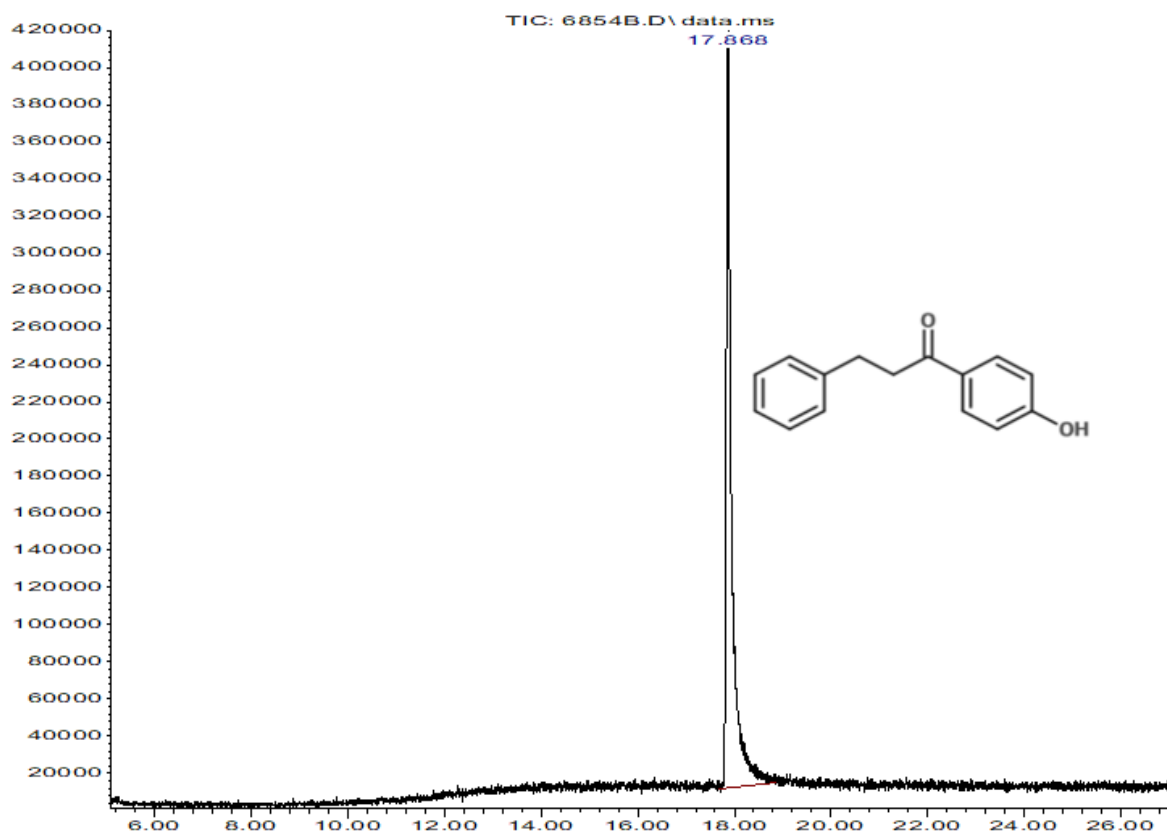

Abundance

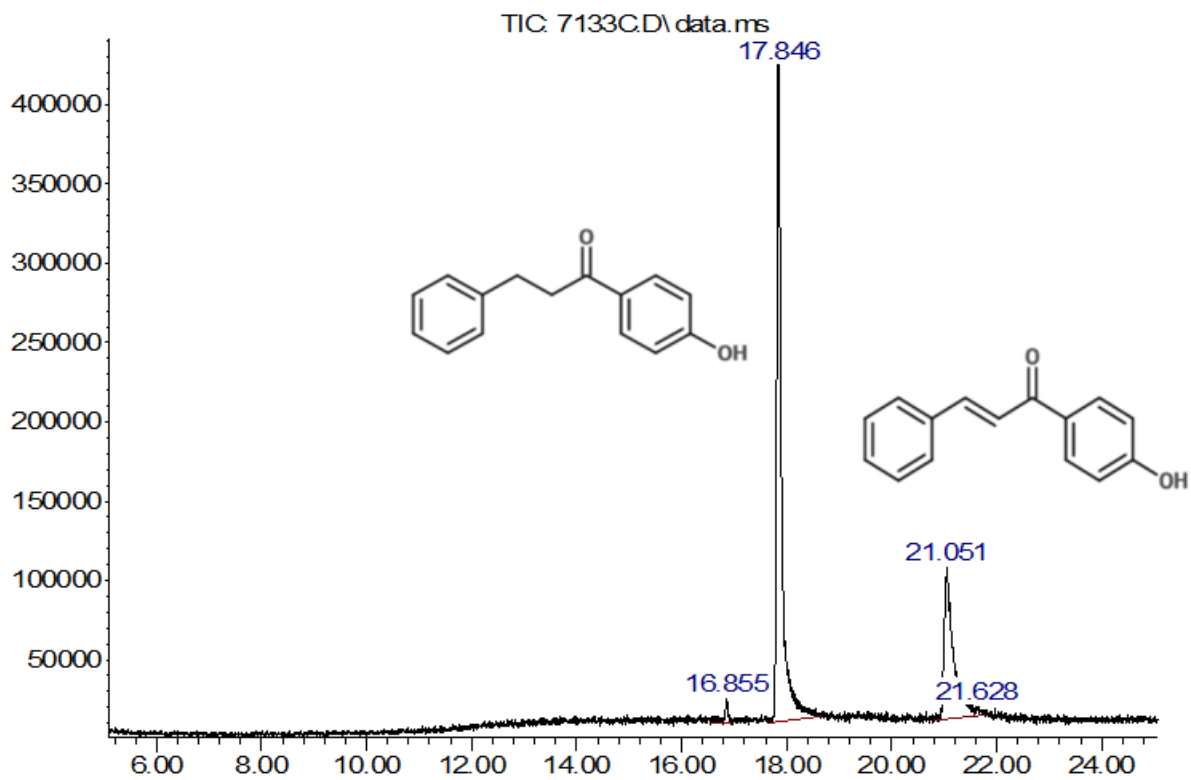

Abundance

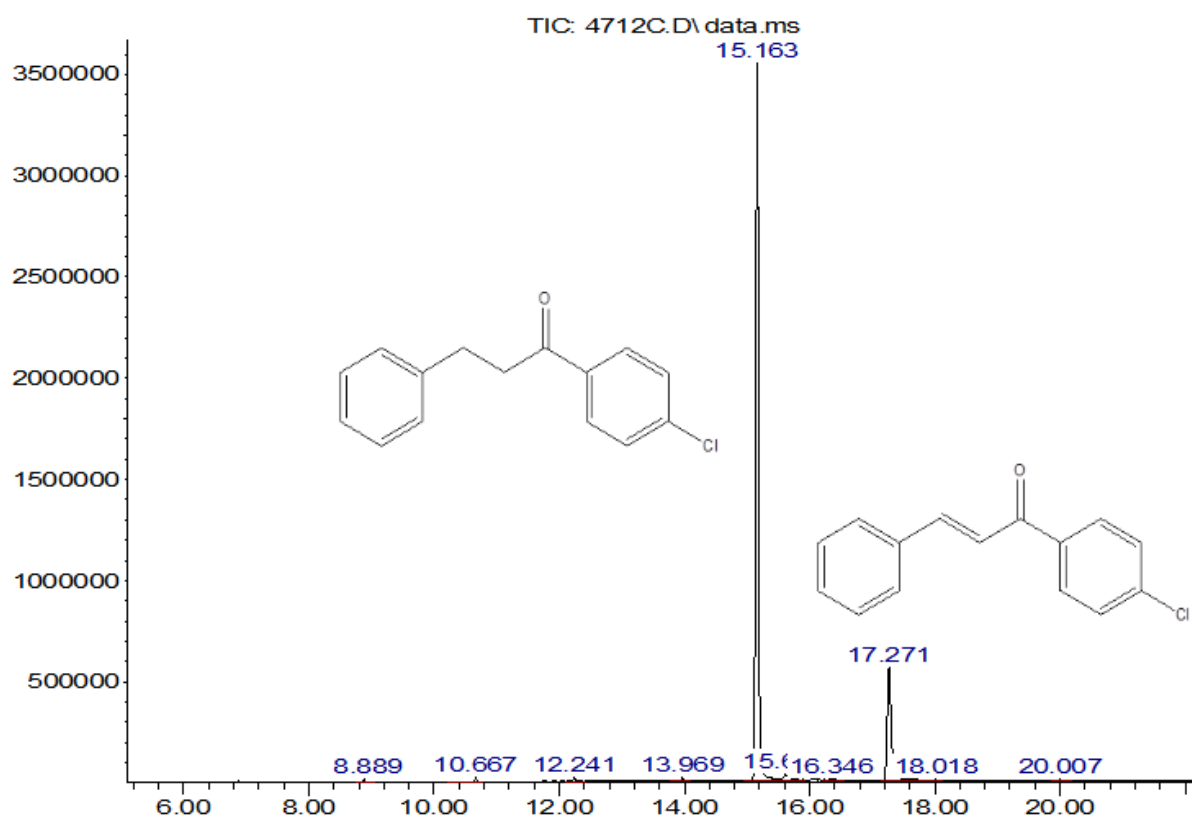

Abundance

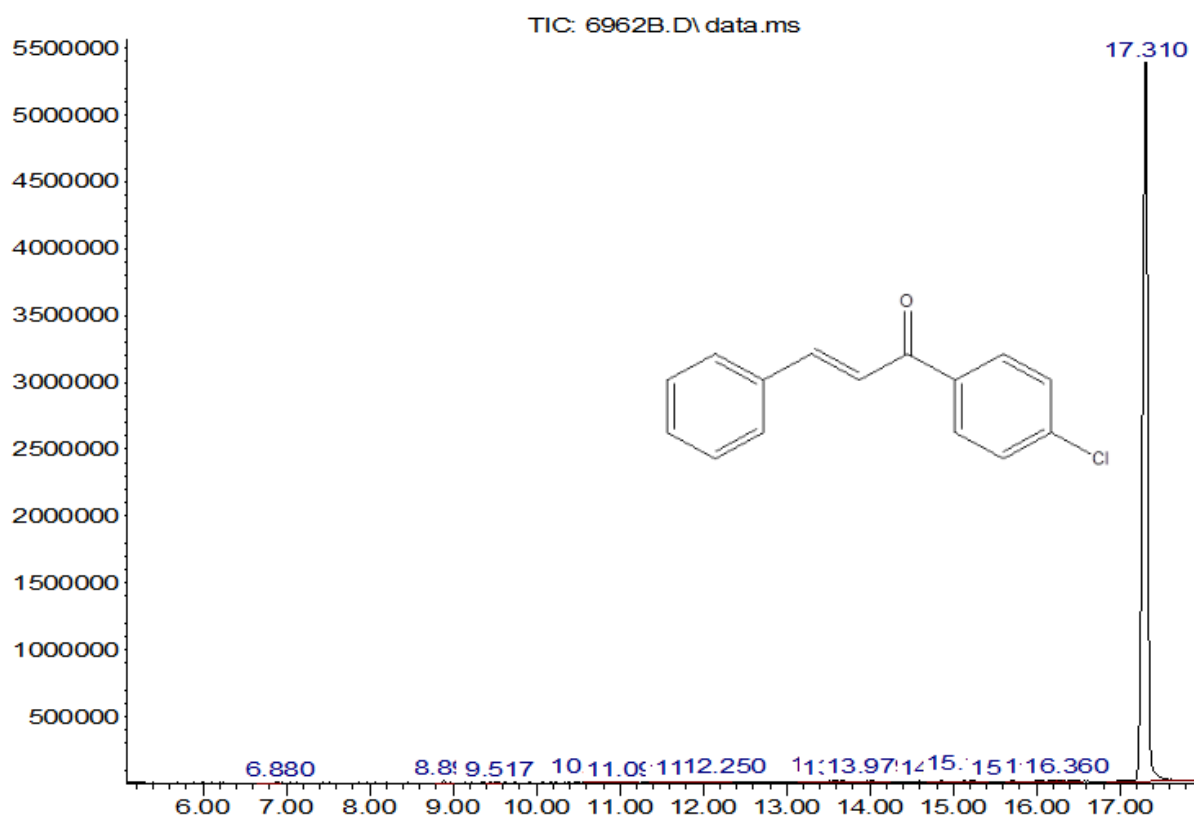

Abundance

TIC: 7123A.D\data.ms

17.272

3200000  
3000000  
2800000  
2600000  
2400000  
2200000  
2000000  
1800000  
1600000  
1400000  
1200000  
1000000  
800000  
600000  
400000  
200000

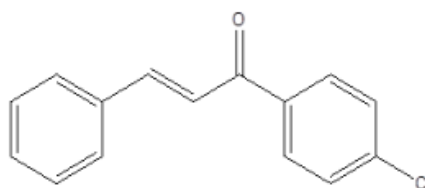

6.878 8.888 10.665 11.122 12.243 13.914 14.846 16.340

Time-->

6.00 8.00 10.00 12.00 14.00 16.00 18.00 20.00
